# Supplementary material for: Classification models for clear cell renal carcinoma stage progression, based on tumor RNAseq expression trained supervised machine learning algorithms
Source: PubMed Central journal article supplement (PMC4202178; doi:10.1186/1753-6561-8-s6-s2), 2014-10-13

**Figure S1A. Gender wise stage distribution of the TCGA ccRCC patients**

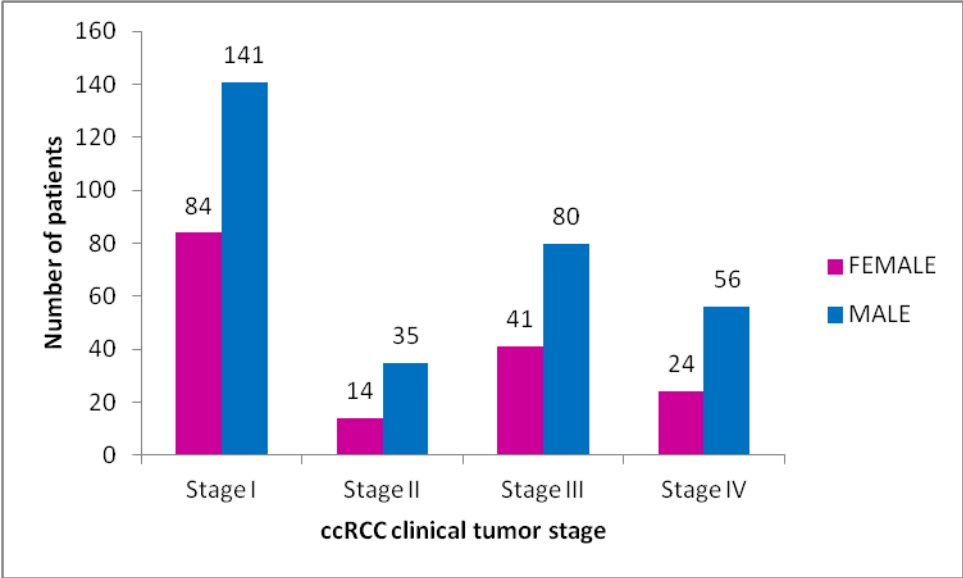

**Figure S1B. Age distribution of the TCGA ccRCC patients**

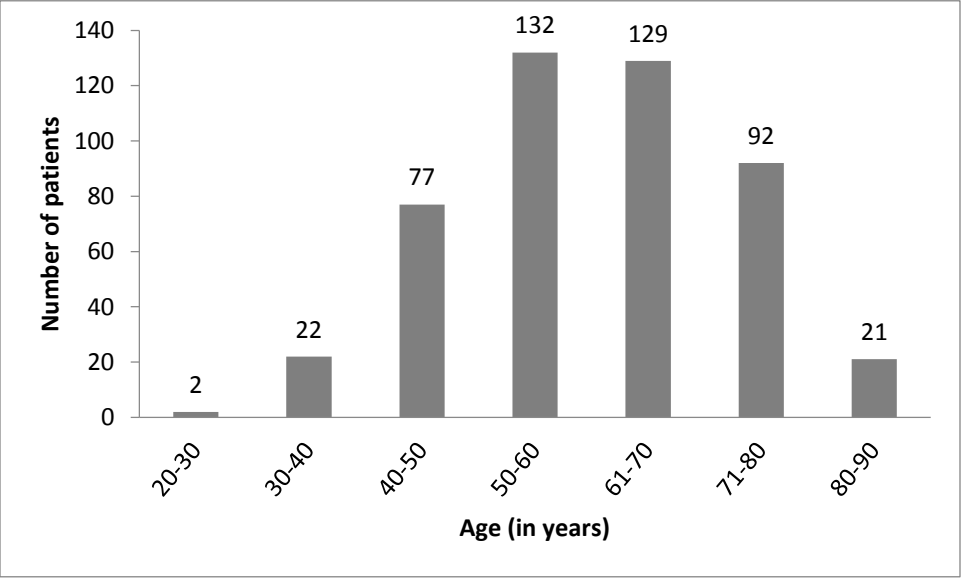

Supplement: 1753-6561-8-S6-S2-S1.pdf [file 1753-6561-8-S6-S2-S1.pdf]
