# Supplementary material for: Classification models for clear cell renal carcinoma stage progression, based on tumor RNAseq expression trained supervised machine learning algorithms
Source: PubMed Central journal article supplement (PMC4202178; doi:10.1186/1753-6561-8-s6-s2), 2014-10-13
Supplement: 1753-6561-8-S6-S2-S6.pdf [file 1753-6561-8-S6-S2-S6.pdf]

**Figure S5A: GO annotation for Biological Process by WebGestalt.**  
(<http://bioinfo.vanderbilt.edu/webgestalt/>)

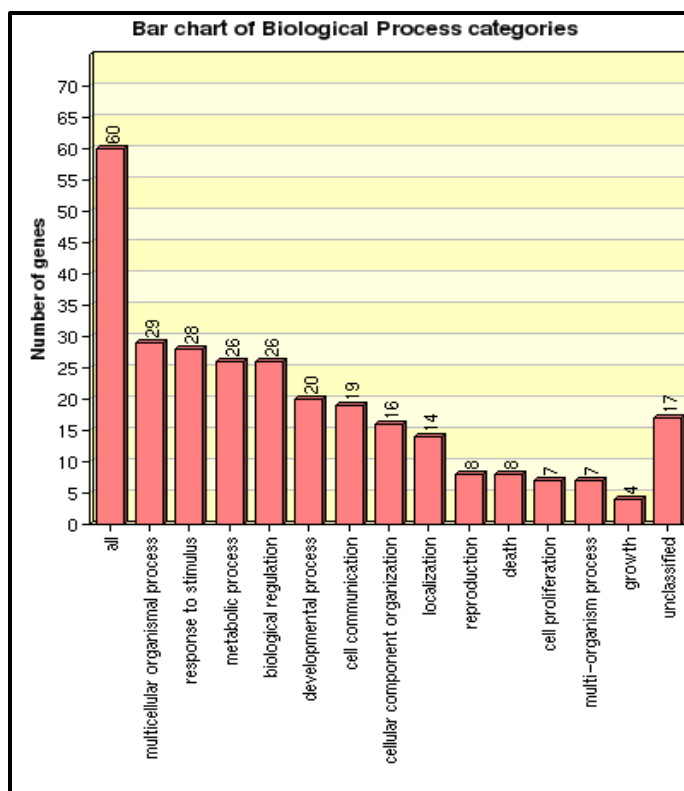

**Figure S5B: Screen Shot of Oncoprint for genomic alterations in selected 62 genes in ccRCC cases in cBioPortal for Cancer Genomics.**

(<http://www.cbioportal.org/public-portal/>)

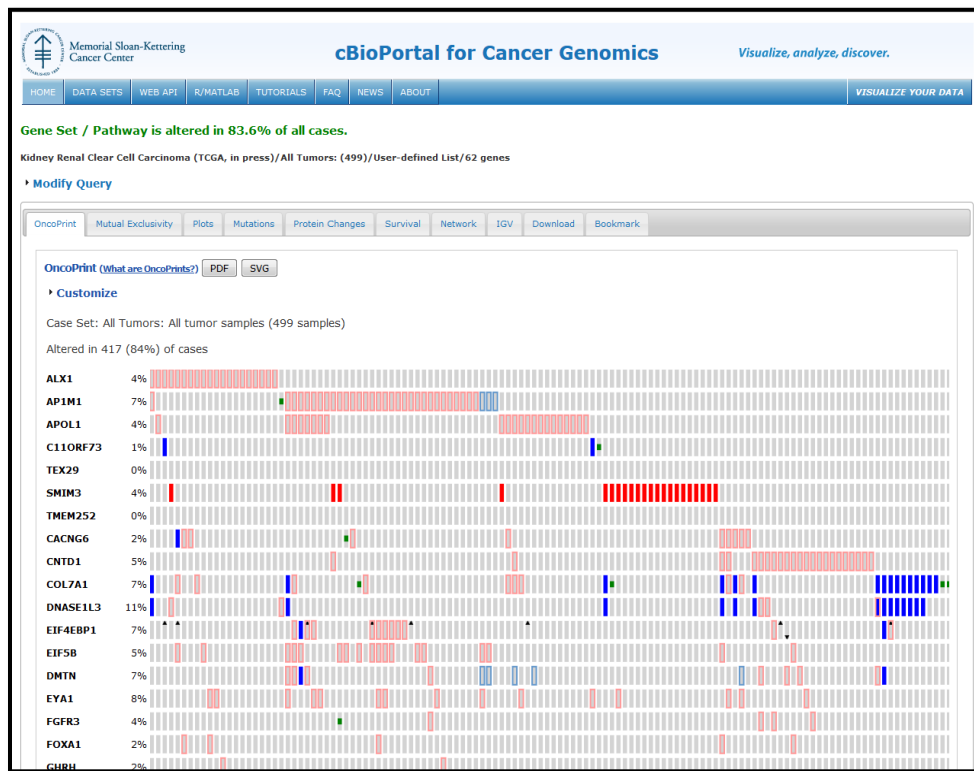

**Figure S5C: Overall Survival Kaplan-Meier Estimate for selected 62 genes in ccRCC cases in cBioPortal for Cancer Genomics.**

(<http://www.cbioportal.org/public-portal/>)

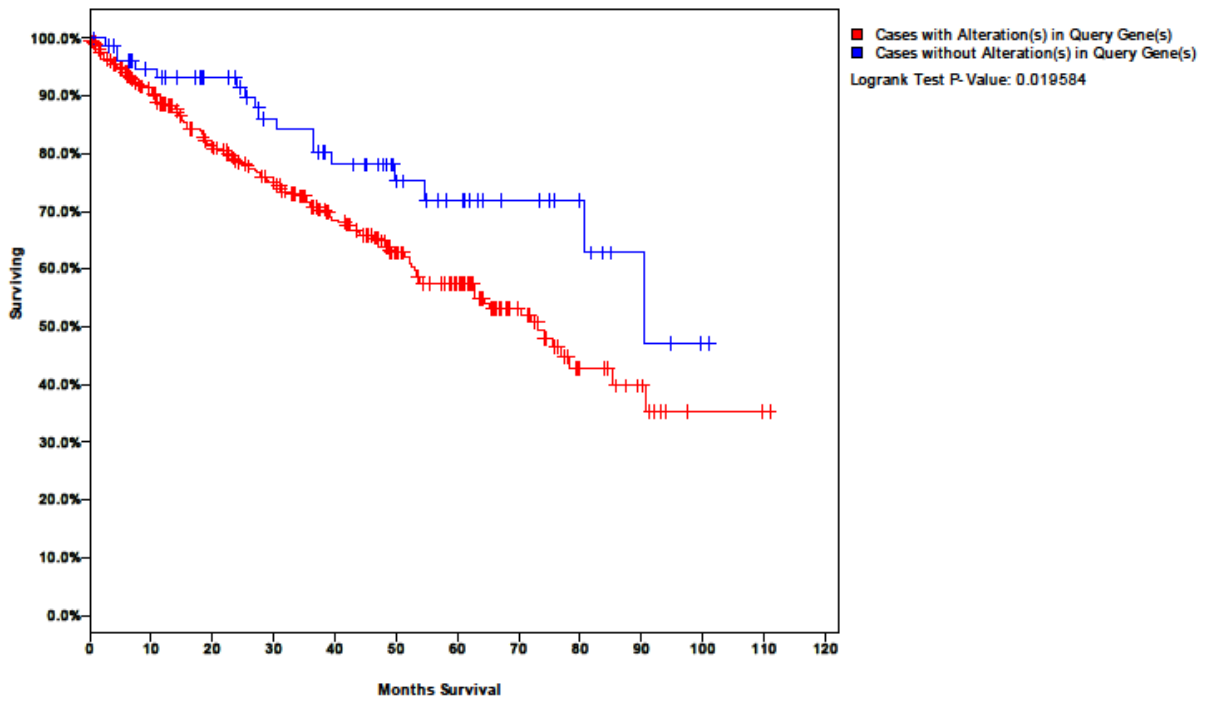

|                                              | #total cases | #cases deceased | median months survival |
|----------------------------------------------|--------------|-----------------|------------------------|
| Cases with Alteration(s) in Query Gene(s)    | 364          | 130             | 73.17                  |
| Cases without Alteration(s) in Query Gene(s) | 78           | 17              | 90.38                  |
